# Supplementary material
Source: PubMed Central journal article supplement (PMC3908652)

## SUPPLEMENTARY FIGURE

**SUPPLEMENTAL FIGURE 1. Phenotypes of CD11b<sup>-</sup> and CD11b<sup>+</sup> APC subsets from spleen.** Splenocytes were isolated from B6 spleen and stained with biotininated lineage antibodies (CD3, CD19, Ig M, TER119, and DX5), followed by incubation with streptavidin APC, CD11c FITC, CD11b APC-Cy7, and PE conjugated antibodies for CD4, CD8, CD135 (FLT3), F4/80, Gr-1 (Ly6G/C), NK1.1, CD317 (PDCA-1), CD115, CD24, CD90, CD80, CD86 and I-A<sup>b</sup> (MHC-II) and PE conjugated isotype matched antibody. Cells were gated on CD11c<sup>hi</sup> CD11b<sup>(lo/neg)</sup> and CD11c<sup>+(lo and medium)</sup> CD11b<sup>neg</sup>, and CD11c<sup>+(lo and medium)</sup> CD11b<sup>+</sup>. FACS plots are from a single experiment representative of 5 replicate experiments.

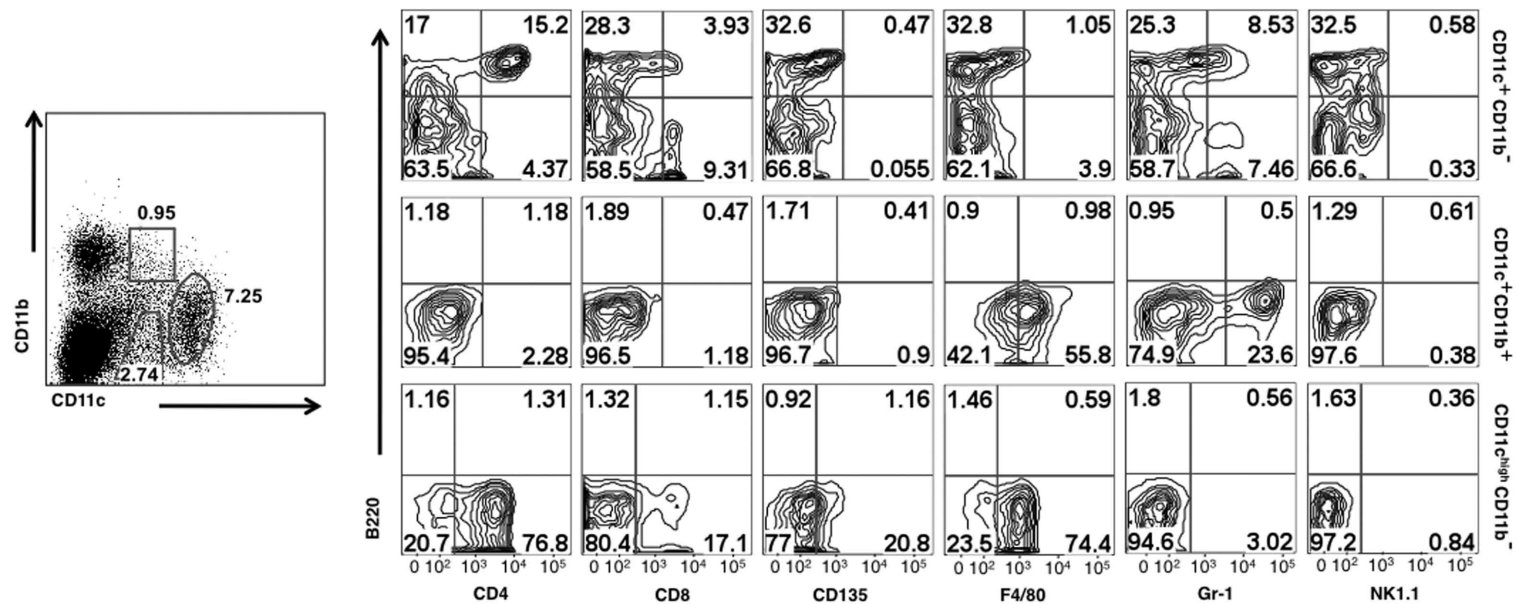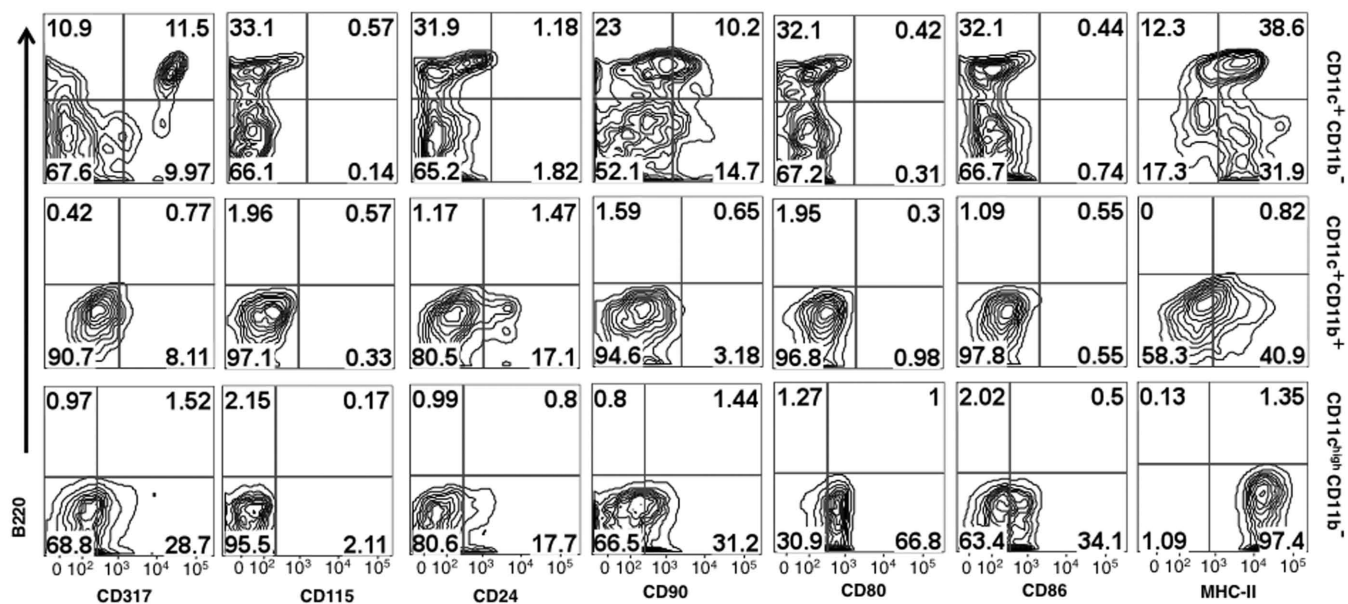

## SUPPLEMENTARY FIGURE

**SUPPLEMENTAL FIGURE 2. Enhanced *ex vivo* alloantigen specific T-cell proliferation and Th1 cytokine polarization of donor T-cells from recipients of CD11b<sup>-</sup> APC.** B6 donor T-cells were isolated from the spleens of recipient mice on day 15 post-transplant by negative MACS selection using a cocktail of antibodies (Methods) plus anti-CD45.2. CFSE-labeled donor T-cells were cultured with irradiated (30Gy) B6 syngenic, B10 recipient-type, or B/c third-party splenocytes. **A-B**, Numbers of cell divisions in **(A)** CD4<sup>+</sup> and **(B)** CD8<sup>+</sup> donor T-cells following MLR co-culture with B10 splenocytes (minimal proliferation was seen for T-cells co-cultured with syngenic B6 or B/c stimulators, data not shown). **C-D**, Percentages of B6 CD4<sup>+</sup> and CD8<sup>+</sup> T-cells harvested day 15 post-transplant expressing IFN- $\gamma$  or IL-4 after 3 days MLR culture against syngenic, recipient, or B/c third-party splenocytes, determined by intracellular cytokine staining. \*p<0.05, \*\*p<0.01, \*\*\*p<0.001, comparing results from HSC & T-cell group with those from groups that also received APC.

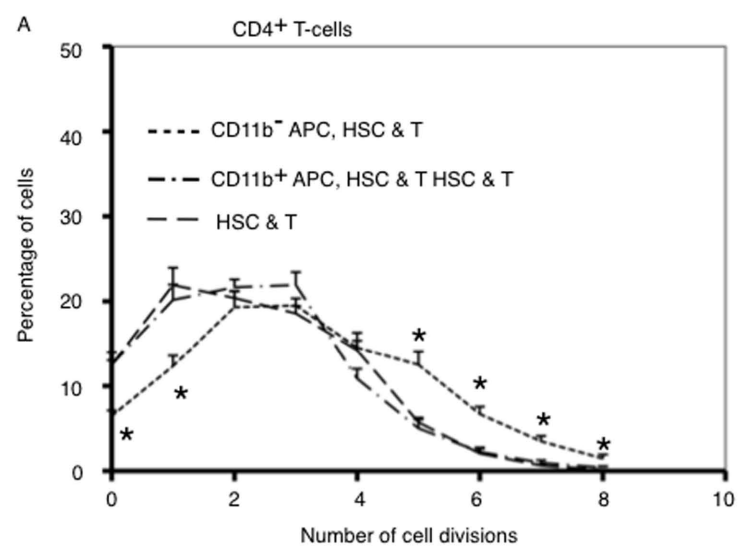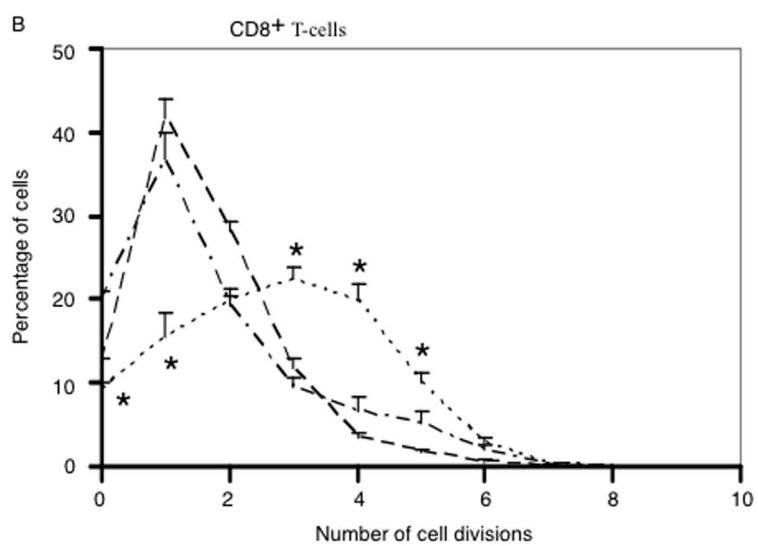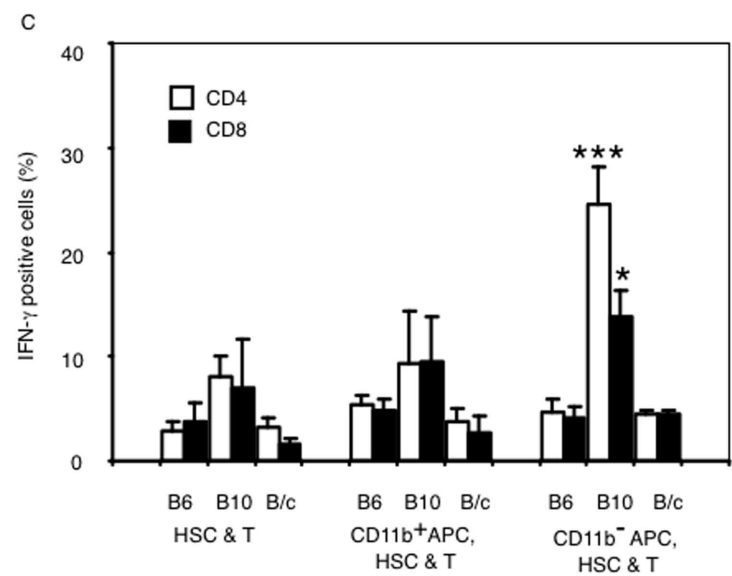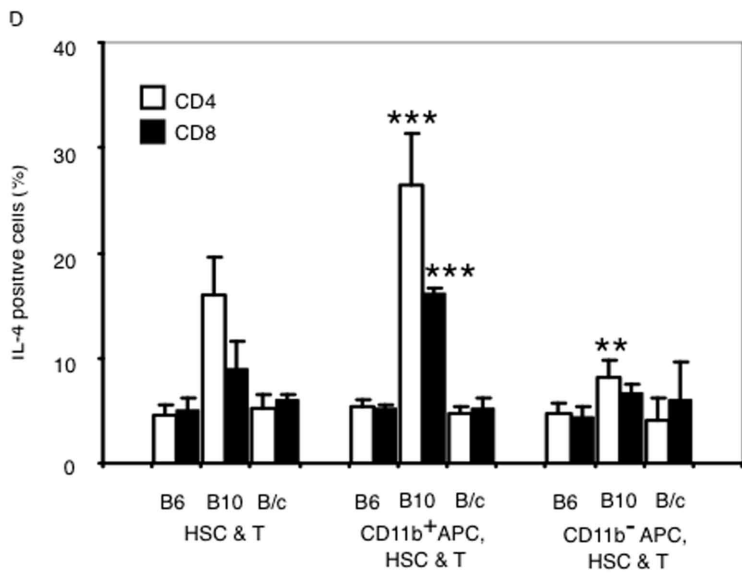

Supplement: NIHMS549152-supplement-2.pdf [file NIHMS549152-supplement-2.pdf]
